## QUESTIONNAIRE

I am conducting this study towards completion of my Doctorate degree in Entomology. Please give me a few minutes of your time to complete this questionnaire. The questions that you will be asked include information on knowledge, attitude and practices regarding the application of pesticides and resistance development in ladybird beetle (*Coccinella septempunctata*). Please note that your contribution in this study is highly appreciated. The information you provide will be treated confidentially and with dignity. Answer the questions as honest as possible as that will allow us to have a clear understanding of what is known and unknown, and in turn, plan relevantly according to the needs of this community.

| A. SOCIO DEMOGRAPHIC DETAILS. |                                           |                                            |  |
|-------------------------------|-------------------------------------------|--------------------------------------------|--|
| A1.                           | Gender<br>جنس                             | Male مرد                                   |  |
|                               |                                           | Female عورت                                |  |
| A2.                           | Age<br>عمر                                |                                            |  |
| A3.                           | Marital Status<br>ازدواجی حیثیت           | Single<br>غیر شادی شدہ                     |  |
|                               |                                           | Married<br>شادی شدہ                        |  |
|                               |                                           | Divorced<br>طلاق یافتہ                     |  |
|                               |                                           | Widowed<br>رنٹوا / بیوہ                    |  |
| A4.                           | Education level<br>تعلیمی قابلیت.         | No formal education<br>غیر رسمی تعلیم      |  |
|                               |                                           | Primary level<br>پرائمری لیول              |  |
|                               |                                           | Middle level<br>مڈل لیول                   |  |
|                               |                                           | Secondary level<br>ثانوی لیول              |  |
|                               |                                           | Higher secondary level<br>اعلیٰ ثانوی لیول |  |
|                               |                                           | Under Graduate level<br>انڈر گریجویٹ       |  |
|                               |                                           | Graduate level<br>گریجویٹ لیول             |  |
| A5.                           | Farm size (ha)<br>فارم کا رقبہ (ایکڑ میں) | < 0.1                                      |  |
|                               |                                           | 0.11- 0.5                                  |  |
|                               |                                           | 0.51-1.0                                   |  |
|                               |                                           | > 0.1                                      |  |
| A6.                           | Irrigation method<br>آبیاشی کا نظام       | Drip اریگیشن                               |  |
|                               |                                           | Sprinkler<br>چھڑکاؤ کا نظام                |  |
|                               |                                           | Tube well<br>ٹیوب ویل                      |  |

|                                    |                                                                                                                           |                                   |  |  |
|------------------------------------|---------------------------------------------------------------------------------------------------------------------------|-----------------------------------|--|--|
|                                    |                                                                                                                           | Canal Irrigation<br>نہری نظام     |  |  |
|                                    |                                                                                                                           | Other دیگر                        |  |  |
| A7                                 | Farming experience<br>کھیتی باڑی کا تجربہ                                                                                 |                                   |  |  |
| A8                                 | Working hours<br>کام کے اوقات                                                                                             |                                   |  |  |
| <b>B. AWARENESS AND KNOWLEDGE.</b> |                                                                                                                           |                                   |  |  |
| B1                                 | Which pesticides are most commonly used? (Name of product)<br>کونسی کیڑے مار دوا عام طور پر استعمال کرتے ہیں؟ (نام لکھیں) |                                   |  |  |
| B2                                 | For which Crop Type pesticides are used?<br>کس قسم کی فصل کے لئے یہ کیڑے مار دوا استعمال کر رہے ہیں؟                      | Wheat گندم                        |  |  |
|                                    |                                                                                                                           | Rice چاول                         |  |  |
|                                    |                                                                                                                           | Sugar cane گنا                    |  |  |
|                                    |                                                                                                                           | Millet جو                         |  |  |
|                                    |                                                                                                                           | Sorghum جوار                      |  |  |
|                                    | Vegetables.. سبزیاں                                                                                                       |                                   |  |  |
| B3                                 | For which pest pesticides are used?<br>کس کیڑے کے لئے یہ کیڑے مار دوا استعمال کر رہے ہیں؟                                 | Aphid تिला                        |  |  |
|                                    |                                                                                                                           | Smut جالے                         |  |  |
|                                    |                                                                                                                           | Whitefly سفید مکھی                |  |  |
|                                    |                                                                                                                           | Jassid ٹڈے                        |  |  |
|                                    |                                                                                                                           | Mildew پھپھوندی                   |  |  |
|                                    |                                                                                                                           | Mealy bug سسری                    |  |  |
|                                    |                                                                                                                           | Termites دیمک                     |  |  |
| B4                                 | How many years have you been using pesticides?<br>کتنے سال سے یہ کیڑے مار دوا استعمال کر رہے ہیں؟                         |                                   |  |  |
| B5                                 | What is the Frequency of spray/ Ha used?<br>ایک ایکڑ میں کتنی کثرت سے استعمال کر رہے ہیں؟                                 | Two times دو دفعہ                 |  |  |
|                                    |                                                                                                                           | Three times تین دفعہ              |  |  |
|                                    |                                                                                                                           | Four times چار دفعہ               |  |  |
|                                    |                                                                                                                           | Five Times پانچ دفعہ              |  |  |
|                                    |                                                                                                                           | Other دیگر                        |  |  |
| B6                                 | Pesticides are Sprayed at which Stage of crop?<br>فصل کے کس درجہ پر کیڑے مار دوا استعمال کر رہے ہیں؟                      | Early stage بیج بونے کے فوراً بعد |  |  |
|                                    |                                                                                                                           | Grown stage اگنے کے بعد           |  |  |
|                                    |                                                                                                                           | Mature Stage                      |  |  |

|     |                                                                                                                                                   |                                                                                    |  |
|-----|---------------------------------------------------------------------------------------------------------------------------------------------------|------------------------------------------------------------------------------------|--|
|     |                                                                                                                                                   | تیار ہونے پر                                                                       |  |
|     |                                                                                                                                                   | Harvesting stage<br>فصل کاٹنے وقت.                                                 |  |
| B7  | Which method is adopted for application of pesticides?<br>کونسا طریقہ استعمال میں لایا جاتا ہے سپرے کرتے وقت؟                                     | Aerial. ہوائی طریقہ.                                                               |  |
|     |                                                                                                                                                   | Mixture with water<br>پانی میں ملا کر.                                             |  |
|     |                                                                                                                                                   | Synergist<br>مددگار                                                                |  |
| B8  | Is label information are followed during Pesticides handling?<br>جب کیڑے مار دوا لگائی جاتی ہے تو ہدایت میں دی گئی معلومات کو مدنظر رکھا جاتا ہے؟ | Follow label Information<br>ہدایات میں دی گئی معلومات پر عمل کرتے ہیں              |  |
|     |                                                                                                                                                   | Proper Dose<br>ادویات کی صحیح مقدار میں استعمال                                    |  |
|     |                                                                                                                                                   | Follow Schedule of spray<br>سپرے کے جدول پر عمل کیا جاتا ہے                        |  |
|     |                                                                                                                                                   | Maintenance of Pesticide Container<br>ادویات کے ڈبوں کی حفاظت کا خیال رکھا جاتا ہے |  |
| B9  | Have you ever heard about alternative to synthetic pesticides?<br>کیا آپ نے کیڑے مار ادویات کے متبادل اشیاء کے بارے میں سنا ہے؟                   | Yes جی ہاں                                                                         |  |
|     |                                                                                                                                                   | No جی نہیں.                                                                        |  |
| B10 | If yes then which of alternative to synthetic pesticides you heard?<br>اگر ہاں تو کونسے کیڑے مار ادویات کی متبادل اشیاء کے بارے میں سنا ہے؟       | Bio pesticides<br>سند کوبی                                                         |  |
|     |                                                                                                                                                   | Organic farming<br>نامیاتی کاشتکاری                                                |  |
|     |                                                                                                                                                   | Crop rotation<br>زرعی گردش                                                         |  |
|     |                                                                                                                                                   | Cultivating crop mixtures<br>مختلف فصلوں کا مجموعہ کاشت کرنا.                      |  |
| B11 | Have you heard about IPM?<br>کیا IPM کے بارے میں آپ نے سنا ہے؟                                                                                    | Yes جی ہاں                                                                         |  |
|     |                                                                                                                                                   | No جی نہیں.                                                                        |  |
| B12 | Have you ever tried IPM or biological control agents?<br>کیا آپ نے کبھی آئی پی ایم یا قدرتی کنٹرول کا استعمال کیا ہے؟                             | Yes جی ہاں                                                                         |  |
|     |                                                                                                                                                   | No جی نہیں.                                                                        |  |
| B13 | Do you have knowledge about natural enemies?<br>کیا آپ نے کبھی قدرتی دشمن حشرات کے بارے میں سنا ہے؟                                               | Yes جی ہاں                                                                         |  |
|     |                                                                                                                                                   | No جی نہیں.                                                                        |  |
| B14 | Do you think pesticides are economical to                                                                                                         | Yes جی ہاں                                                                         |  |

|                     |                                                                                                                                |                                                                                            |  |  |
|---------------------|--------------------------------------------------------------------------------------------------------------------------------|--------------------------------------------------------------------------------------------|--|--|
|                     | be used?<br>کیا آپ کے خیال میں کیڑے مار ادویات کا استعمال<br>فائدہ مند ہے؟                                                     | No جی نہیں.                                                                                |  |  |
| C. Farmer Practices |                                                                                                                                |                                                                                            |  |  |
| C1                  | Crop Practices<br>کاشت کاری کے کونسے طریقہ کار کو استعمال کیا<br>جاتا ہے؟                                                      | Cultural Control<br>ثقافتی طریقہ                                                           |  |  |
|                     |                                                                                                                                | Chemical Control<br>کیمیائی طریقہ                                                          |  |  |
|                     |                                                                                                                                | Biological Control<br>بائیولوجیکل طریقہ                                                    |  |  |
| C2                  | Which methods of empty pesticide<br>container disposal you use?<br>کونسے طریقے سے حالی کیڑے مار دوا کے ڈبے<br>کو تلف کرتے ہیں؟ | IPM<br>آئی پی ایم                                                                          |  |  |
|                     |                                                                                                                                | Government collection<br>گورنمنٹ اکٹھا کرتے ہیں۔                                           |  |  |
|                     |                                                                                                                                | Burrry<br>دفنا دیتے ہیں                                                                    |  |  |
|                     |                                                                                                                                | Burnt<br>جلا دیتے ہیں                                                                      |  |  |
|                     |                                                                                                                                | Throw in trash<br>کوڑا دان میں پھینک دیتے ہیں                                              |  |  |
|                     |                                                                                                                                | Other<br>دیگر۔                                                                             |  |  |
| C3                  | Farmer Training And Skills<br>کسانوں کی تربیت اور مہارت۔                                                                       | Training About<br>pesticides application.<br>کیڑے مار ادویات کے استعمال<br>کے متعلق تربیت۔ |  |  |
|                     |                                                                                                                                | Assistance from<br>Agricultural Officer.<br>زرعی افسر سے رہنمائی لینا۔                     |  |  |
|                     |                                                                                                                                | Ability to use acquired<br>skills.<br>دی گئی مہارتوں کا استعمال۔                           |  |  |
| C4                  | Which protective measures are adopted<br>during spray?<br>کونسی احتیاطی تدابیر آپ سپرے کرتے ہوئے<br>اپناتے ہیں؟                | Hand gloves.<br>دستانے                                                                     |  |  |
|                     |                                                                                                                                | Eye glasses<br>چشمہ                                                                        |  |  |
|                     |                                                                                                                                | Overall<br>حفاظتی لبادہ                                                                    |  |  |
|                     |                                                                                                                                | Respirator<br>آلہ تنفس                                                                     |  |  |
|                     |                                                                                                                                | Face Mask<br>فیس ماسک                                                                      |  |  |
|                     |                                                                                                                                | Boot/Shoes<br>لمبے جوتے                                                                    |  |  |
|                     |                                                                                                                                | Others.                                                                                    |  |  |

|    |                                                                                         |                  |  |  |
|----|-----------------------------------------------------------------------------------------|------------------|--|--|
|    |                                                                                         | دیگر             |  |  |
| C5 | At which time of day you spray the pesticides? دن کے کس وقت ادویات کا سپرے کیا جاتا ہے؟ | Morning صبح      |  |  |
|    |                                                                                         | Noon دوپہر       |  |  |
|    |                                                                                         | Afternoon سہ پہر |  |  |
|    |                                                                                         | Evening شام      |  |  |

|                   |        |
|-------------------|--------|
| COMMENTS (If Any) | رانے ۔ |
|                   |        |

Thank you
