## Supplementary data

Table 1

|                           | <b>Category</b>      | <b>Percentage</b> |
|---------------------------|----------------------|-------------------|
| <b>Gender</b>             | Male                 | 93.7              |
|                           | Female               | 6.3               |
| <b>Age</b>                | 10-20 years          | 9.7               |
|                           | 21-30 years          | 32.3              |
|                           | 31-40 years          | 35.0              |
|                           | 41-50 years          | 11.0              |
|                           | 51-60 years          | 9.0               |
|                           | More Than 60 years   | 3.0               |
| <b>Marital Status</b>     | Single               | 11.0              |
|                           | Married              | 85.0              |
|                           | Divorced             | 2.7               |
|                           | Widow/Widower        | 1.3               |
| <b>Educational level</b>  | Non Formal Education | 34.3              |
|                           | Primary Level        | 16.0              |
|                           | Middle Level         | 8.3               |
|                           | Secondary level      | 6.7               |
|                           | Higher Secondary     | 11.0              |
|                           | Under Graduate Level | 11.3              |
|                           | Graduate Level       | 12.3              |
| <b>Form Size (ha)</b>     | <0.1                 | 28.7              |
|                           | 0.11-0.5             | 41.0              |
|                           | 0.51-1.0             | 16.0              |
|                           | >0.1                 | 14.0              |
| <b>Irregation Method</b>  | Drip                 | 17.7              |
|                           | Sprinkler            | 7.0               |
|                           | Tube Well            | 72.0              |
|                           | Canal Irregation     | 3.3               |
| <b>Farming Experience</b> | 1-3 years            | 18.0              |

|                            |                    |      |
|----------------------------|--------------------|------|
|                            | 4-6 years          | 28.3 |
|                            | 7-9years           | 35.3 |
|                            | 10-12 years        | 13.0 |
|                            | more than 12 years | 5.0  |
| <b>Working Hours daily</b> | 1-3 hours          | 28.3 |
|                            | 4-6 hours          | 38.7 |
|                            | 7-9 hours          | 19.0 |
|                            | 10-12 hours        | 12.0 |
|                            | more than 12 hours | 2.0  |

**Table 2**

|                                                       | <b>Category</b>    | <b>Percentage</b> |
|-------------------------------------------------------|--------------------|-------------------|
| <b>For which crop type pesticides are used?</b>       | Wheat              | 31.0              |
|                                                       | Rice               | 23.0              |
|                                                       | Sugar Cane         | 1.0               |
|                                                       | Millet             | 2.3               |
|                                                       | Sorghum            | 4.0               |
|                                                       | Vegetables         | 38.7              |
| <b>Which Pesticides are most commonly used?</b>       | Name not label     | 99.3              |
|                                                       | Agrowar            | .7                |
| <b>For which Pest, Pesticides are used?</b>           | Aphid              | 49.0              |
|                                                       | Smut               | 10.0              |
|                                                       | White Fly          | 12.0              |
|                                                       | Jassid             | 13.7              |
|                                                       | Mildew             | 10.3              |
|                                                       | Mealy Bug          | 3.0               |
|                                                       | Termites           | 2.0               |
| <b>How many years have you been using pestisides?</b> | 0-5 years          | 35.3              |
|                                                       | 6-10 years         | 39.0              |
|                                                       | 11-15 years        | 15.7              |
|                                                       | More than 15 Years | 10.0              |

|                                                       |                               |      |
|-------------------------------------------------------|-------------------------------|------|
| <b>What is the frequency of spray/Ha used?</b>        | Two times for a crop season   | 14.7 |
|                                                       | Three times for a crop season | 46.3 |
|                                                       | Four times for a crop season  | 32.3 |
|                                                       | Five times for a crop season  | 6.7  |
| <b>Pesticides are sprayed at which stage of crop?</b> | Early Stage                   | 67.3 |
|                                                       | Grown Stage                   | 18.7 |
|                                                       | Mature Stage                  | 8.3  |
|                                                       | Harvesting Stage              | 5.7  |
| <b>Pesticides are sprayed at which stage of crop?</b> | Aerial                        | 67.3 |
|                                                       | Mixture with water            | 18.7 |
|                                                       | Synergist                     | 8.3  |

**Table 3**

|                                                                             |                                    |      |
|-----------------------------------------------------------------------------|------------------------------------|------|
| <b>Is label information are followed during pesticides handling?</b>        | Follow Label Information           | 45.7 |
|                                                                             | Proper Dose                        | 22.3 |
|                                                                             | Follow Schedule of spray           | 14.7 |
|                                                                             | Maintenance of Pesticide Container | 17.3 |
| <b>If Yes then which of alternative to syenthatic pesticides you heard?</b> | Bio Pesticides                     | 3.3  |
|                                                                             | Organic Farming                    | 1.0  |
|                                                                             | Crop Rotation                      | 88.3 |
|                                                                             | Cultivating Crop Mixture           | 7.3  |
| <b>Crop Practices</b>                                                       | Cultural Control                   | 27.0 |
|                                                                             | Chemical Control                   | 60.3 |

|                                                                    |                                       |      |
|--------------------------------------------------------------------|---------------------------------------|------|
|                                                                    | Biological Control                    | 7.3  |
|                                                                    | IPM                                   | 5.3  |
| <b>Which method of empty pesticide container disposal you use?</b> | Government Collection                 | 3.7  |
|                                                                    | Bury                                  | 55.7 |
|                                                                    | Burnt                                 | 12.3 |
|                                                                    | Throw in Trash                        | 28.3 |
| <b>Farmer Training and Skills</b>                                  | training about pesticides application | 12.0 |
|                                                                    | Assistance from Agricultural Officer. | 82.7 |
|                                                                    | Ability to use acquired skills        | 5.3  |
| <b>Which protective measure are adopted during spray?</b>          | Hand Gloves                           | 53.3 |
|                                                                    | Eye Glasses                           | 10.3 |
|                                                                    | Overall                               | 1.7  |
|                                                                    | Respirator                            | 1.7  |
|                                                                    | Face Mask                             | 29.7 |
|                                                                    | Boot/Shoes                            | 3.3  |
| <b>At which time of day you spray the pesticides?</b>              | Morning                               | 54.7 |
|                                                                    | Noon                                  | 2.0  |
|                                                                    | Afternoon                             | 36.7 |
|                                                                    | Evening                               | 6.7  |

**Table 4**

|                                                                       | <b>Category</b> | <b>Percentage</b> |
|-----------------------------------------------------------------------|-----------------|-------------------|
| <b>Have you ever heard about alternative to synthetic pesticides?</b> | Yes             | 38.7              |
|                                                                       | No              | 61.3              |
| <b>Have you heard about IPM?</b>                                      | Yes             | 31.7              |
|                                                                       | No              | 68.3              |
| <b>Have you ever tried IPM or biological control agents?</b>          | Yes             | 29.3              |
|                                                                       | No              | 70.7              |
| <b>Do you have knowledge of natural enemies?</b>                      | Yes             | 33.3              |
|                                                                       | No              | 66.7              |

|                                                           |     |      |
|-----------------------------------------------------------|-----|------|
| <b>Do you think Pesticides are economical to be used?</b> | Yes | 7.0  |
|                                                           | No  | 93.0 |

**Table 5**

|                                                |                                           | Non Formal Education |                     | Primary Level |                      | Middle Level |                      | Secondary level |                      | Higher Secondary |                     | Under Graduate Level |                      | Graduate Level |                     |
|------------------------------------------------|-------------------------------------------|----------------------|---------------------|---------------|----------------------|--------------|----------------------|-----------------|----------------------|------------------|---------------------|----------------------|----------------------|----------------|---------------------|
|                                                |                                           | P-value              | OR (95%CI)          | P-value       | OR (95%CI)           | P-value      | OR (95%CI)           | P-value         | OR (95%CI)           | P-value          | OR (95%CI)          | P-value              | OR (95%CI)           | P-value        | OR (95%CI)          |
| <b>Heard IPM</b>                               | <b>Yes</b>                                |                      | 1                   |               | 1                    |              | 1                    |                 | 1                    |                  | 1                   |                      | 1                    |                | 1                   |
|                                                | <b>No</b>                                 | .000                 | 2.29<br>(1.46-3.36) | .000          | 2.21<br>(1.46-3.36)  | .011         | 2.20<br>(1.19-4.05)  | .079            | 2.12<br>(.91-4.92)   | .655             | 1.22<br>(.50-2.94)  | .012                 | 2.66<br>(1.24-5.73)  | .009           | 2.77<br>(1.29-5.95) |
| <b>Biological Control</b>                      | <b>Yes</b>                                |                      | 1                   |               | 1                    |              | 1                    |                 | 1                    |                  | 1                   |                      | 1                    |                | 1                   |
|                                                | <b>No</b>                                 | .000                 | 2.43<br>(1.59-3.72) | .000          | 2.433<br>(1.59-3.72) | .011         | 2.200<br>(1.19-4.05) | .034            | 2.57<br>(1.07-6.15)  | .187             | 1.85<br>(.74-4.65)  | .061                 | 2.00<br>(.97-4.12)   | .004           | 3.25<br>(1.47-7.17) |
| <b>Natural Enemies</b>                         | <b>Yes</b>                                |                      | 1                   |               | 1                    |              | 1                    |                 | 1                    |                  | 1                   |                      | 1                    |                | 1                   |
|                                                | <b>No</b>                                 | .025                 | 1.57<br>(1.06-2.34) | .025          | 1.57<br>(1.06-2.34)  | .011         | 2.20<br>(1.19-4.05)  | .002            | 5.25<br>(1.80-15.29) | .374             | 1.50<br>(.61-3.67)  | .002                 | 3.71<br>(1.61-8.55)  | .494           | 1.26<br>(.64-2.49)  |
| <b>Follow label Information B8<sup>a</sup></b> | <b>Follow Proper Dose</b>                 | .03                  | .59<br>(.36-.96)    | .08           | .52<br>(.25-1.08)    | .06          | .30<br>(.08-1.09)    | .01             | .15<br>(.03-.68)     | .32              | .66<br>(.30-1.48)   | .12                  | .52<br>(.23-1.18)    | .28            | .35<br>(.13-.89)    |
|                                                | <b>Follow Schedule of spray</b>           | .001                 | .40<br>(.23-.78)    | .004          | .23<br>(.09-.63)     | .206         | .50<br>(.17-1.46)    | .014            | .15<br>(.03-.68)     | .011             | .20<br>(.05-.69)    | .016                 | .29<br>(.10-.79)     | .028           | .35<br>(.13-.89)    |
|                                                | <b>Maintenance of Pesticide Container</b> | .000                 | .34<br>(.19-.61)    | .08           | .52<br>(.25-1.08)    | .46          | .70<br>(.26-1.08)    | .02             | .23<br>(.06-.81)     | .01              | .26<br>(.08-.80)    | .006                 | .17<br>(.05-.60)     | .079           | .47<br>(.20-1.09)   |
|                                                | <b>Drip</b>                               |                      | 1                   |               | 1                    |              | 1                    |                 | 1                    |                  | 1                   |                      | 1                    |                | 1                   |
| <b>Irrigation method</b>                       | <b>Sprinkler</b>                          | .40                  | .42<br>(.18-.96)    | .05           | .22<br>(.04-1.02)    | .            | .                    | .               | .                    | .73              | 1.25<br>(.33-4.65)  | .142                 | .20<br>(.02-1.71)    | .739           | 1.25<br>(.33-4.65)  |
|                                                | <b>Tube Well</b>                          | .000                 | 3.78<br>(2.28-6.28) | .000          | 3.88<br>(1.86-8.09)  | .006         | 4.0<br>(1.50-10.65)  | .18             | 1.85<br>(.74-4.65)   | .001             | 6.0<br>(2.08-17.29) | .001                 | 5.20<br>(1.99-13.54) | .000           | 6.5<br>(2.26-18.62) |
|                                                | <b>Canal Irrigation</b>                   | .005                 | .21<br>(.07-.61)    | .054          | .22<br>(.04-1.02)    | .            | .                    | .               | .                    | .                | .                   | .273                 | .40<br>(.07-2.06)    | .423           | .50<br>(.09-2.73)   |

**Table 6**

Table 7

|                                         |                              | Non Formal Education |                     | Primary Level |                     | Middle Level |                    | Secondary level |                    | Higher Secondary |                      | Under Graduate Level |                    | Graduate Level |                     |
|-----------------------------------------|------------------------------|----------------------|---------------------|---------------|---------------------|--------------|--------------------|-----------------|--------------------|------------------|----------------------|----------------------|--------------------|----------------|---------------------|
|                                         |                              | P-value              | OR (95%CI)          | P-value       | OR (95%CI)          | P-value      | OR (95%CI)         | P-value         | OR (95%CI)         | P-value          | OR (95%CI)           | P-value              | OR (95%CI)         | P-value        | OR (95%CI)          |
| <b>Crop Practices</b>                   | <b>Cultural Control</b>      |                      | 1                   |               | 1                   |              | 1                  |                 | 1                  |                  | 1                    |                      | 1                  |                | 1                   |
|                                         | <b>Chemical Control</b>      | .000                 | 2.78<br>(1.72-4.48) | .090          | 1.73<br>(.918-3.27) | .39          | 1.44<br>(.61-3.37) | .166            | 2.00<br>(.75-5.32) | .006             | 3.228<br>(1.41-7.65) | .136                 | 1.80<br>(.83-3.89) | .023           | 2.27<br>(1.11-4.61) |
|                                         | <b>Biological Control</b>    | .028                 | .43<br>(.20-.91)    | .019          | .26<br>(.08-.80)    | .054         | .22<br>(.04-1.02)  | .               | .                  | .118             | .28<br>(.05-1.37)    | .121                 | .40<br>(.12-1.27)  | .              | .                   |
|                                         | <b>IPM</b>                   | .003                 | .26<br>(.10-.64)    | .011          | .20<br>(.05-.69)    | .037         | .11<br>(.01-.87)   | .178            | .33<br>(.06-1.65)  | .069             | .14<br>(.01-1.16)    | .038                 | .20<br>(.04-.91)   | .022           | .09<br>(.01-.70)    |
| <b>Disposal of empty containers</b>     | <b>Government Collection</b> |                      | 1                   |               | 1                   |              | 1                  |                 | 1                  |                  | 1                    |                      | 1                  |                | 1                   |
|                                         | <b>Bury</b>                  | .000                 | 63<br>(8.73-454-2)  | .001          | 11<br>(2.58-46.7)   | .054         | 4.5<br>(.97-20.8)  | .080            | 4<br>(.84-18.8)    | .005             | 18<br>(2.40-134.8)   | .001                 | 12<br>(2.83-50.7)  | .002           | 23<br>(3.1-170.3)   |
|                                         | <b>Burnt</b>                 | .013                 | 13<br>(1.70-99.3)   | .423          | 2<br>(.36-10.9)     | .423         | 2<br>(.36-10.9)    | 1               | 1<br>(.14-7.0)     | .142             | 5<br>(.58-42.7)      | .423                 | 2<br>(.36-10.9)    | .142           | 5<br>(.58-42.7)     |
|                                         | <b>Throw in Trash</b>        | .001                 | 26<br>(3.52-191.5)  | .002          | 10<br>(2.3-42.7)    | .038         | 5<br>(1.09-22.8)   | .080            | 4<br>(.84-18.8)    | .037             | 9<br>(1.14-71.03)    | .423                 | 2<br>(.36-10.91)   | .050           | 8<br>(1-63.9)       |
| <b>Training and Protective measures</b> | <b>Hand Gloves</b>           |                      | 1                   |               | 1                   |              | 1                  |                 | 1                  |                  | 1                    |                      | 1                  |                | 1                   |
|                                         | <b>Eye Glasses</b>           | .000                 | .17<br>(.09-.34)    | .001          | .16<br>(.05-.46)    | .013         | .07<br>(.01-.58)   | .017            | .08<br>(.01-.64)   | .058             | .40<br>(.15-1.03)    | .002                 | .10<br>(.02-.42)   | .034           | .38<br>(.16-.93)    |
|                                         | <b>Overall</b>               | .000                 | .01<br>(.002-.12)   | .             | .                   | .013         | .07<br>(.01-.58)   | .017            | .08<br>(.01-.64)   | .009             | .06<br>(.009-.50)    | .003                 | .05<br>(.007-.37)  | .              | .                   |
|                                         | <b>Respirator</b>            | .000                 | .03<br>(.009-.14)   | .002          | .04<br>(.005-.29)   | .            | .                  | .               | .                  | .007             | .13<br>(.03-.58)     | .                    | .                  | .              | .                   |
|                                         | <b>Face Mask</b>             | .004                 | .52<br>(.33-.81)    | .163          | .64<br>(.34-1.2)    | .533         | .76<br>(.33-1.75)  | .057            | .33<br>(.10-1.03)  | .226             | .60<br>(.26-1.3)     | .074                 | .50<br>(.23-1.06)  | .136           | .55<br>(.25-1.20)   |
|                                         | <b>Boot/Shoes</b>            | .000                 | .05<br>(.01-.16)    | .001          | .08<br>(.01-.33)    | .            | .                  | .019            | .16<br>(.03-.74)   | .                | .                    | .003                 | .05<br>(.007-.37)  | .003           | .11<br>(.02-.47)    |

|       |                                      | Non Formal Education |                     | Primary Level |                     | Middle Level |                    | Secondary level |                    | Higher Secondary |                    | Under Graduate Level |                    | Graduate Level |                     |
|-------|--------------------------------------|----------------------|---------------------|---------------|---------------------|--------------|--------------------|-----------------|--------------------|------------------|--------------------|----------------------|--------------------|----------------|---------------------|
|       |                                      | P-value              | OR (95%CI)          | P-value       | OR (95%CI)          | P-value      | OR (95%CI)         | P-value         | OR (95%CI)         | P-value          | OR (95%CI)         | P-value              | OR (95%CI)         | P-value        | OR (95%CI)          |
| Spray | <b>TWO TIMES FOR A CROP SEASON</b>   |                      | 1                   |               | 1                   |              | 1                  |                 | 1                  |                  | 1                  |                      | 1                  |                | 1                   |
|       | <b>THREE TIMES FOR A CROP SEASON</b> | .000                 | 4.99<br>(2.56-9.38) | .024          | 2.71<br>(1.14-6.45) | .566         | 1.40<br>(.44-4.41) | .083            | 2.75<br>(.87-8.63) | .069             | 2.26<br>(.92-7.29) | .068                 | 2.28<br>(.94-5.55) | .008           | 3.80<br>(1.41-10.1) |
|       | <b>Four TIMES FOR A CROP SEASON</b>  | .003                 | 2.18<br>(1.41-5.60) | .048          | 2.42<br>(1.0-5.85)  | .100         | 2.40<br>(.84-6.81) | 1               | 1<br>(.250-3.99)   | .069             | 2.60<br>(.92-7.29) | .469                 | 1.42<br>(.54-3.75) | .206           | 2<br>(.68-5.85)     |
|       | <b>Five TIMES FOR A CROP SEASON</b>  | .350                 | .63<br>(.24-1.64)   | .566          | .71<br>(.22-2.25)   | .142         | .20<br>(0.23-1.71) | .215            | .25<br>(.02-2.23)  | .273             | .40<br>(.07-2.06)  | .069                 | .143<br>(.01-1.16) | .484           | .60<br>(.143-2.51)  |
